# Supplementary material
Source: publisher figshare collection journal article supplement (https://karger.figshare.com/articles/dataset/_/4028997)
Supplement: Supplementary file 1 [file 1]

**Supplementary table 1.** Genome size and time of origin in 29 species of salamanders. The data for genome size are from Animal genome size database [Gregory, 2015]; the time of origin is from Marjanovic and Laurin [2007].

| Species                             | Genome size (pg/N) | Myllion years ago |
|-------------------------------------|--------------------|-------------------|
| <i>Andrias japonicus</i>            | 46.5               | 28                |
| <i>Cryptobranchus alleganiensis</i> | 55                 | 60                |
| <i>Siren lacertina/intermedia</i>   | 55.35              | 48                |
| <i>Pseudobranchius striatus</i>     | 49.5               | 51                |
| <i>Rhyacotriton</i>                 | 71.2               | 77                |
| <i>Hynobius nebulosos</i>           | 19.2               | 15.97             |
| <i>Onicodactylus</i>                | 47.5               | 20                |
| <i>Amphiuma means</i>               | 75                 | 62                |
| <i>Aneides flavipunctatus</i>       | 42.9               | 23                |
| <i>Bolitoglossa subpalmata</i>      | 61.5               | 43                |
| <i>Desmognathus (X)</i>             | 17.7               | 30                |
| <i>Ensatina eschscholzii</i>        | 41.5               | 34                |
| <i>Eurycea longicaudata</i>         | 28.6               | 40                |
| <i>Plethodon glutinosus</i>         | 28                 | 24                |
| <i>Necturus maculosus</i>           | 80.5               | 62                |
| <i>Proteus anguinus</i>             | 48.8               | 16                |
| <i>Dicamptodon</i>                  | 56.8               | 62                |
| <i>Ambystoma opacum</i>             | 30.6               | 34                |
| <i>Ambystoma tigrinum</i>           | 27.6               | 34                |
| <i>Chioglossa lusitanica</i>        | 29.22              | 28                |
| <i>Cynops pirrhogaster</i>          | 43.06              | 14                |
| <i>Notophtalmus viridescens</i>     | 35                 | 16                |
| <i>Pleurodeles waltl</i>            | 25.6               | 14                |
| <i>Salamandra salamandra</i>        | 35.2               | 16                |
| <i>Salamandrina terdigitata</i>     | 20.6               | 23                |
| <i>Taricha torosa</i>               | 28                 | 28                |
| <i>Triturus cristatus</i>           | 27.8               | 23                |
| <i>Tylototriton</i>                 | 25                 | 55                |
